# Supplementary material for: DNA damage contributes to age-associated differences in SARS-CoV-2 infection
Source: Research Square preprint supplement (doi:10.21203/rs.3.rs-301544/v2), 2021-04-22
Supplement: Supplementary file 1 [file 318c076fe929b690bfb9bd05.xlsx]

## Sheet: Antibodies
Antibodies	Source	Cat. Num.	Application	Dilution
γH2Ax	Abcam	ab2893	IF	1:100
γH2Ax	Cell signailing	9718	WB	1:8000
γH2Ax	Abcam	ab2893	IHC	1:1000
p-CHK1	Cell signailing	2348	WB	1:1000
CHK1	Proteintech	25887-1-AP	WB	1:1000
p-CHK2	Cell signailing	2197	WB	1:1000
CHK2	Abcam	ab32055	WB	1:1000
Actin	Proteintech	HRP-60008	WB	1:10000
Myc-594	MBL	M047-7	IF	1:100
Phalloidin	Invitrogen	A22287	IF	1:400
anti-S	Sino Biological	40591-T62	IF	1:200
Myc-HRP	Santa cruz	sc40HRP	WB	1:3000
Flag-HRP	Sigma	A8592	WB	1:3000
ATM	Millipore	07-1286	WB	1:1000
ATR	Cell signailing	2790	WB	1:200
ACE2	Abcam	ab108252	WB	1:2000
ACE2	Abcam	ab108252	IF	1:200
ACE2	Abcam	ab108252	IHC	1:200 (Lung), 1:1000 (Intestine)
TMPRSS2	Proteintech	14437-1-AP	WB	1:1000
c-Jun	Proteintech	9165	WB	1:2000
p-c-Jun (Ser73)	Cell signailing	3270	WB	1:1000
p-c-Jun (Ser73)	Cell signailing	3270	IF	1:200
p-c-Jun (Ser73)	Cell signailing	3270	IHC	1:200
Stat1	Cell signailing	14994	WB	1:1000
DPP4	Proteintech	10940-1-AP	WB	1:1000
PES1	Santa cruz	sc-166300	WB	1:200
WDR12	abcam	ab111955	WB	1:1000
